# Supplementary material for: Effects of psychosocial function in pediatric-onset inflammatory bowel disease during the coronavirus disease 2019 pandemic
Source: Frontiers journal article supplement (doi:10.3389/fped.2023.955293), 2023-02-07
Supplement: Data_Sheet_1.pdf [file Data_Sheet_1.pdf]

## *Supplementary Material*

### **1 Supplementary Tables**

Supplementary Table 1. The correlation analysis of clinical characteristics and PSQI, CDI, SCAS

| Index                 | CRP      | During of disease | Vomit  |
|-----------------------|----------|-------------------|--------|
| <b>PSQI</b>           |          |                   |        |
| Daytime dysfunction   | 0.606**  | -0.055            | 0.052  |
| Sleep quality         | 0.163    | 0.413*            | -0.015 |
| <b>CDI</b>            |          |                   |        |
| Interpersonal problem | -0.646** | 0.636**           | 0.045  |
| <b>SCAS</b>           |          |                   |        |
| Panic/agoraphobia     | -0.347   | 0.807**           | -0.003 |
| Generalised anxiety   | 0        | 0.087             | 0.414* |

PSQI, Pittsburgh Sleep Quality Index; CDI, Children's Depression Inventory; SCAS, The Spence Children's Anxiety Scale; CRP, C-reactive protein; \*,  $P < 0.05$ ; \*\*,  $P < 0.01$ .

Supplementary Table 2. The difference analysis of PSQI, CDI and SCAS before and during COVID-19

|                               | Before(N=39) | During(N=42) | t      | P     |
|-------------------------------|--------------|--------------|--------|-------|
| <b>PSQI</b>                   | 3.87±1.95    | 3.53±1.94    | 0.705  | 0.483 |
| Sleep quality                 | 1.03±0.64    | 0.60±0.62    | 2.772  | 0.007 |
| Sleep latency                 | 0.66±0.75    | 0.80±0.66    | -0.818 | 0.416 |
| Sleep duration                | 0.13±0.53    | 0.13±0.35    | -0.016 | 0.988 |
| Sleep Efficiency              | 0.24±0.63    | 0.33±0.66    | -0.612 | 0.543 |
| Sleep disturbances            | 0.97±0.28    | 0.77±0.50    | 2.012  | 0.05  |
| Sleep Medication              | 0.05±0.23    | 0.20±0.55    | -1.376 | 0.177 |
| Daytime Dysfunction           | 0.79±0.58    | 0.70±0.65    | 0.6    | 0.551 |
| <b>CDI</b>                    | 12.50±6.16   | 9.43±6.71    | 1.959  | 0.054 |
| Negative Mood                 | 3.61±1.98    | 2.2±2.02     | 2.878  | 0.005 |
| Interpersonal Problem         | 0.71±0.87    | 0.6±1.22     | 0.436  | 0.664 |
| Ineffectiveness               | 2.84±1.73    | 1.77±1.59    | 2.634  | 0.01  |
| Anhedonia                     | 3.58±2.38    | 3.03±2.55    | 0.909  | 0.366 |
| Negative Self-Esteem          | 1.76±1.38    | 1.83±1.21    | -0.22  | 0.827 |
| <b>SCAS</b>                   | 25.37±14.66  | 25.31±15.25  | 0.016  | 0.987 |
| Panic/agoraphobia             | 2.95±3.37    | 2.83±2.98    | 0.152  | 0.88  |
| Separation anxiety            | 2.82±2.66    | 3.48±3.31    | -0.914 | 0.364 |
| Social phobia                 | 5.74±4.45    | 5.69±4.17    | 0.044  | 0.965 |
| Physical injury fears         | 4.42±2.34    | 4.28±3.03    | 0.221  | 0.826 |
| Obsessive-compulsive disorder | 4.45±3.18    | 3.76±2.39    | 0.976  | 0.333 |
| Generalised anxiety           | 4.21±2.71    | 4.24±3.15    | -0.043 | 0.966 |

PSQI,Pittsburgh Sleep Quality Index;CDI,Children's Depression Inventory;SCAS,The Spence Children's Anxiety

Scale;COVID-19,Corona virus disease 2019; P< 0.05 was considered statistically significant.

Supplementary Table 3. The correlation analysis of scales before and during COVID-19 pandemic

| Pearson       | PedsQL  | PSQI   | CDI    | SCAS |
|---------------|---------|--------|--------|------|
| <b>Before</b> |         |        |        |      |
| PedsQL        | 1       |        |        |      |
| PSQI          | -.415** | 1      |        |      |
| CDI           | -.519** | 0.321  | 1      |      |
| SCAS          | -0.307  | 0.323  | .586** | 1    |
| <b>During</b> |         |        |        |      |
| PedsQL        | 1       |        |        |      |
| PSQI          | -.524** | 1      |        |      |
| CDI           | -.653** | .468** | 1      |      |
| SCAS          | -.483** | .484** | .495** | 1    |

PedsQL, Pediatric quality of life inventory; PSQI,Pittsburgh Sleep Quality Index; CDI,Children's Depression Inventory; SCAS,The Spence Children's Anxiety Scale.\*\*,  $P < 0.01$ ,  $P < 0.05$  was considered statistically significant.

## 2 Supplementary Figures

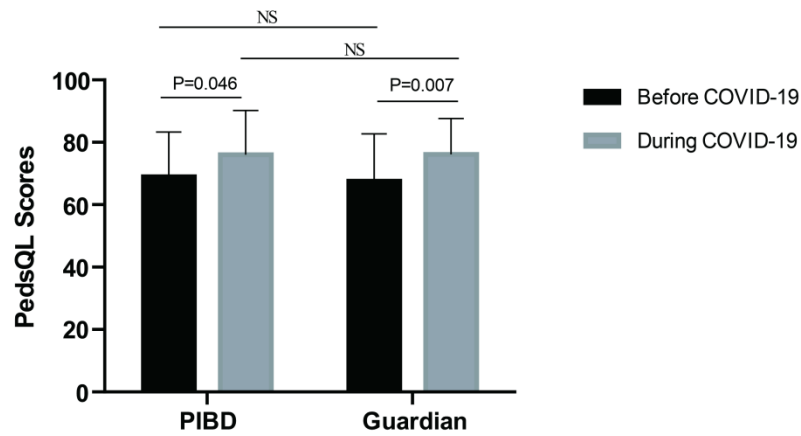

**Supplementary Figure 1.** The difference analysis of PedsQL before and during COVID-19 pandemic

PIBD<sub>bef</sub>=39, PIBD<sub>dur</sub>=42, Guardian<sub>bef</sub>=40, Guardian<sub>dur</sub>=36.

COVID-19, Corona virus disease 2019; bef, before; dur, during.
